# Supplementary material for: A framework towards digital twins for type 2 diabetes
Source: Front Digit Health. 2024 Jan 26;6:1336050. doi: 10.3389/fdgth.2024.1336050 (PMC10853398; doi:10.3389/fdgth.2024.1336050)
Supplement: Supplementary Table 1 — List of all multiomic features used for the different prediction models. [file Table1.xlsx]

## Sheet: Sheet1
Clinical subset	Clinical full	Proteins (Olink panel - Uniprot ID)	Metabolites (chemical name)
INSULIN	A/G RATIO	CVD2_O00182	1-methylnicotinamide
GLUCOSE	ADIPONECTIN, SERUM	CVD2_O00220	alpha-ketoglutarate
GLYCOHEMOGLOBIN A1C	ALAT (SGPT)	CVD2_O00253	kynurenate
GFR, MDRD	ALBUMIN	CVD2_O14763	3-hydroxyisobutyrate
ALBUMIN	ALKALINE PHOSPHATASE	CVD2_O14836	3-hydroxy-3-methylglutarate
CREATININE ENZ, SER	ARACHIDONIC ACID	CVD2_O43915	cholate
HDL CHOL DIRECT	ASAT (SGOT)	CVD2_O94907	5,6-dihydrothymine
HEMATOCRIT	BASOPHILS	CVD2_P00797	hypoxanthine
HEMOGLOBIN	BASOPHILS ABSOLUTE	CVD2_P01127	linoleate (18:2n6)
LDL-CHOL CALCULATION	BILIRUBIN, TOTAL	CVD2_P01241	laurate (12:0)
TRIGLYCERIDES	BUN/CREAT RATIO	CVD2_P01730	quinolinate
age	CALCIUM	CVD2_P01833	N6,N6,N6-trimethyllysine
is_m	CARBON DIOXIDE (CO2)	CVD2_P02760	N-acetylputrescine
bmi	CHLORIDE	CVD2_P04179	N-formylmethionine
	CHOLESTEROL, TOTAL	CVD2_P04792	adenosine 5'-monophosphate (AMP)
	CREATININE ENZ, SER	CVD2_P05231	5-methylthioadenosine (MTA)
	CRP HIGH SENSITIVITY	CVD2_P06858	arachidonate (20:4n6)
	DHA	CVD2_P07204	arginine
	EOSINOPHILS	CVD2_P07585	aspartate
	EOSINOPHILS ABSOLUTE	CVD2_P07711	3-(4-hydroxyphenyl)lactate
	EPA	CVD2_P09237	phenylpyruvate
	FERRITIN	CVD2_P09341	beta-alanine
	FOLIC ACID, SERUM	CVD2_P09601	biliverdin
	GFR, MDRD	CVD2_P09874	succinate
	GGT	CVD2_P10147	3-hydroxybutyrate (BHBA)
	GLOBULIN	CVD2_P12104	cholesterol
	GLUCOSE	CVD2_P12931	choline phosphate
	GLYCOHEMOGLOBIN A1C	CVD2_P13726	cortisone
	HDL CHOL DIRECT	CVD2_P16860	creatinine
	HEMATOCRIT	CVD2_P18510	cystine
	HEMOGLOBIN	CVD2_P19883	sphingosine
	HOMA-IR	CVD2_P21583	sphinganine
	HOMOCYSTEINE, SERUM	CVD2_P21980	fumarate
	IL-6	CVD2_P22004	gamma-glutamylglutamate
	IL-8	CVD2_P24394	gluconate
	INSULIN	CVD2_P25116	glycine
	LDL PARTICLE NUMBER	CVD2_P26022	glycocholate
	LDL SMALL	CVD2_P27352	guanidinoacetate
	LDL-CHOL CALCULATION	CVD2_P29965	histidine
	LEAD, BLOOD	CVD2_P31994	cortisol
	LYMPHOCYTES	CVD2_P31997	myo-inositol
	LYMPHOCYTES ABSOLUTE	CVD2_P35218	isoleucine
	MCH	CVD2_P35318	citrulline
	MCHC	CVD2_P35442	leucine
	MCV	CVD2_P35475	lysine
	MERCURY, BLOOD	CVD2_P39900	malate
	METHYLMALONIC ACID	CVD2_P40225	methionine
	MONOCYTES	CVD2_P41159	palmitate (16:0)
	MONOCYTES ABSOLUTE	CVD2_P47992	nicotinamide
	OMEGA-3 INDEX	CVD2_P49763	stearate (18:0)
	OMEGA-6/OMEGA-3 RATIO	CVD2_P51161	ornithine
	PLATELET COUNT THOUSAND	CVD2_P51888	orotate
	POTASSIUM	CVD2_P78380	palmitoleate (16:1n7)
	PROTEIN, TOTAL SERUM	CVD2_Q02763	phenylalanine
	RDW	CVD2_Q04760	phosphate
	RED CELL COUNT	CVD2_Q12866	proline
	SODIUM	CVD2_Q13043	lactate
	TNF-ALPHA	CVD2_Q13219	retinol (Vitamin A)
	TOTAL NEUTROPHILS	CVD2_Q14005	salicylate
	TOTAL NEUTROPHILS AB	CVD2_Q14116	serine
	TRIGLYCERIDES	CVD2_Q14242	serotonin
	Triglyceride HDL Ratio	CVD2_Q15109	taurine
	UREA NITROGEN	CVD2_Q15389	myristate (14:0)
	URIC ACID	CVD2_Q16651	urea
	VITAMIN D, 25-OH TOT	CVD2_Q16698	uridine
	WHITE CELL COUNT	CVD2_Q76LX8	trans-urocanate
	ZINC	CVD2_Q8IW75	glutamate
	age	CVD2_Q8IYS5	glutamine
	is_m	CVD2_Q8NEV9,Q14213	threonine
	bmi	CVD2_Q8TAD2	tryptophan
		CVD2_Q92583	valine
		CVD2_Q96D42	glucose
		CVD2_Q96IQ7	alpha-ketobutyrate
		CVD2_Q99075	betaine
		CVD2_Q99523	cysteine
		CVD2_Q99895	mannose
		CVD2_Q9BQ51	dimethylglycine
		CVD2_Q9BQR3	alanine
		CVD2_Q9BUD6	tyrosine
		CVD2_Q9BWV1	pseudouridine
		CVD2_Q9BYF1	pyruvate
		CVD2_Q9GZV9	caffeine
		CVD2_Q9HB29	fructose
		CVD2_Q9NQ25	adenine
		CVD2_Q9NSA1	caprate (10:0)
		CVD2_Q9UEW3	margarate (17:0)
		CVD2_Q9UIB8	nonadecanoate (19:0)
		CVD2_Q9UJM8	arachidate (20:0)
		CVD2_Q9UK05	asparagine
		CVD2_Q9UKP3	pentadecanoate (15:0)
		CVD2_Q9Y6K9	trans-4-hydroxyproline
		CVD2_Q9Y6Q6	allantoin
		CVD3_NT-proBNP	xanthine
		CVD3_O00175	5-oxoproline
		CVD3_O00300	sarcosine
		CVD3_O14798	pantothenate
		CVD3_O15467	pipecolate
		CVD3_O75594	phosphoethanolamine
		CVD3_O95998	glycerate
		CVD3_P00533	N-acetylleucine
		CVD3_P00749	N-acetylmethionine
		CVD3_P00750	N-acetylvaline
		CVD3_P01130	erucate (22:1n9)
		CVD3_P02144	bilirubin (Z,Z)
		CVD3_P02452	thyroxine
		CVD3_P02786	gamma-glutamyltyrosine
		CVD3_P04080	alpha-tocopherol
		CVD3_P04085	N-acetylalanine
		CVD3_P04275	vanillylmandelate (VMA)
		CVD3_P05107	4-acetamidobutanoate
		CVD3_P05121	3-aminoisobutyrate
		CVD3_P05164	citrate
		CVD3_P07339	2-aminobutyrate
		CVD3_P08253	urate
		CVD3_P08254	oleoyl ethanolamide
		CVD3_P08833	gamma-glutamylglutamine
		CVD3_P08887	4-hydroxyphenylpyruvate
		CVD3_P10451	N-acetylneuraminate
		CVD3_P10646	creatine
		CVD3_P13500	cys-gly, oxidized
		CVD3_P13598	dihomo-linoleate (20:2n6)
		CVD3_P13686	gamma-glutamylhistidine
		CVD3_P14778	2-hydroxystearate
		CVD3_P14780	N1-methyladenosine
		CVD3_P15085	glycerol
		CVD3_P15086	choline
		CVD3_P15090	gamma-glutamylleucine
		CVD3_P15144	3-methoxytyrosine
		CVD3_P16109	beta-hydroxyisovalerate
		CVD3_P16284	palmitoyl ethanolamide
		CVD3_P16422	N-palmitoyl-sphingosine (d18:1/16:0)
		CVD3_P16581	1-palmitoyl-2-oleoyl-GPE (16:0/18:1)
		CVD3_P17931	1-palmitoyl-2-linoleoyl-GPI (16:0/18:2)
		CVD3_P18065	1-palmitoyl-2-linoleoyl-GPC (16:0/18:2)
		CVD3_P19438	stearoyl sphingomyelin (d18:1/18:0)
		CVD3_P19957	1-palmitoyl-2-oleoyl-GPC (16:0/18:1)
		CVD3_P20333	N-stearoyl-sphingosine (d18:1/18:0)*
		CVD3_P24158	glycochenodeoxycholate
		CVD3_P25445	taurochenodeoxycholate
		CVD3_P27930	2-hydroxyhippurate (salicylurate)
		CVD3_P28799	eicosapentaenoate (EPA; 20:5n3)
		CVD3_P30530	methylsuccinate
		CVD3_P33151	ethylmalonate
		CVD3_P35247	carnitine
		CVD3_P36222	hippurate
		CVD3_P36941	3-methyl-2-oxovalerate
		CVD3_P42574	methionine sulfoxide
		CVD3_P54760	3-methylhistidine
		CVD3_P56470	4-guanidinobutanoate
		CVD3_P78324	glucuronate
		CVD3_P80370	imidazole lactate
		CVD3_P98160	kynurenine
		CVD3_Q01638	glycerophosphorylcholine (GPC)
		CVD3_Q03405	ribitol
		CVD3_Q07654	theophylline
		CVD3_Q12860	quinate
		CVD3_Q13231	theobromine
		CVD3_Q13740	indolelactate
		CVD3_Q13867	3-indoxyl sulfate
		CVD3_Q15166	4-methyl-2-oxopentanoate
		CVD3_Q16270	1,5-anhydroglucitol (1,5-AG)
		CVD3_Q16663	1-palmityl-GPC (O-16:0)
		CVD3_Q5T2D2	1-stearoyl-2-arachidonoyl-GPI (18:0/20:4)
		CVD3_Q86VB7	sphingosine 1-phosphate
		CVD3_Q8NBP7	1-stearoyl-2-oleoyl-GPS (18:0/18:1)
		CVD3_Q92876	1-stearoyl-GPI (18:0)
		CVD3_Q92956	1,2-dipalmitoyl-GPC (16:0/16:0)
		CVD3_Q96F46	docosahexaenoate (DHA; 22:6n3)
		CVD3_Q96PL1	1-myristoyl-2-palmitoyl-GPC (14:0/16:0)
		CVD3_Q99727	alpha-hydroxyisocaproate
		CVD3_Q99969	maleate
		CVD3_Q99988	2-hydroxyoctanoate
		CVD3_Q9H2A7	3-hydroxyoctanoate
		CVD3_Q9HCB6	phenyllactate (PLA)
		CVD3_Q9HD89	palmitoylcarnitine (C16)
		CVD3_Q9NPY3	hexanoylcarnitine (C6)
		CVD3_Q9NQ76	N-acetylaspartate (NAA)
		CVD3_Q9UBR2	dehydroepiandrosterone sulfate (DHEA-S)
		CVD3_Q9UM47	acetylcarnitine (C2)
		CVD3_Q9Y275	cysteine s-sulfate
		CVD3_Q9Y624	1-palmitoylglycerol (16:0)
		INF_O14625	tartronate (hydroxymalonate)
		INF_O14788	oxalate (ethanedioate)
		INF_O15169	erythritol
		INF_O15444	3-hydroxymyristate
		INF_O43508	iminodiacetate (IDA)
		INF_O43557	1-oleoylglycerol (18:1)
		INF_O95630	3-methyl-2-oxobutyrate
		INF_O95750	homoarginine
		INF_O95760	3-hydroxydecanoate
		INF_P00813	EDTA
		INF_P01135	N-acetylglycine
		INF_P01137	ribonate
		INF_P01138	threonate
		INF_P01374	indoleacetate
		INF_P01375	1-linoleoylglycerol (18:2)
		INF_P01579	1-methylhistidine
		INF_P01583	butyrylcarnitine (C4)
		INF_P02778	isobutyrylcarnitine (C4)
		INF_P03956	androsterone sulfate
		INF_P05112	indolepropionate
		INF_P05113	trigonelline (N'-methylnicotinate)
		INF_P06127	dodecanedioate (C12-DC)
		INF_P09238	N-acetyltyrosine
		INF_P09603	3-hydroxylaurate
		INF_P10145	pyridoxate
		INF_P13232	gamma-glutamylvaline
		INF_P13236	propionylcarnitine (C3)
		INF_P13725	pro-hydroxy-pro
		INF_P14210	3-hydroxy-2-ethylpropionate
		INF_P14784	3-carboxy-4-methyl-5-propyl-2-furanpropanoate (CMPF)
		INF_P15018	docosapentaenoate (n3 DPA; 22:5n3)
		INF_P15692	docosadienoate (22:2n6)
		INF_P20783	adrenate (22:4n6)
		INF_P22301	10-undecenoate (11:1n1)
		INF_P25942	myristoleate (14:1n5)
		INF_P28325	1-methyl-4-imidazoleacetate
		INF_P29460	stearidonate (18:4n3)
		INF_P35225	5-dodecenoate (12:1n7)
		INF_P39905	octanoylcarnitine (C8)
		INF_P42702	decanoylcarnitine (C10)
		INF_P42830	N-acetyltryptophan
		INF_P49771	N-acetylphenylalanine
		INF_P50225	1-palmitoyl-GPC (16:0)
		INF_P50591	1-margaroyl-GPC (17:0)
		INF_P51671	N-acetylarginine
		INF_P55773	piperine
		INF_P60568	myristoylcarnitine (C14)
		INF_P78423	1-stearoyl-GPC (18:0)
		INF_P78556	1-oleoyl-GPC (18:1)
		INF_P80075	N-acetylthreonine
		INF_P80098	10-nonadecenoate (19:1n9)
		INF_P80162	10-heptadecenoate (17:1n7)
		INF_P80511	epiandrosterone sulfate
		INF_Q07011	N-acetylhistidine
		INF_Q07325	gamma-glutamylglycine
		INF_Q08334	stachydrine
		INF_Q13007	alpha-hydroxyisovalerate
		INF_Q13261	gamma-glutamylmethionine
		INF_Q13291	gamma-glutamylthreonine
		INF_Q13478	p-cresol sulfate
		INF_Q13541	erythronate*
		INF_Q13651	eicosenoate (20:1)
		INF_Q14790	linolenate [alpha or gamma; (18:3n3 or 6)]
		INF_Q16552	aconitate [cis or trans]
		INF_Q5T4W7	1-myristoyl-GPC (14:0)
		INF_Q8IXJ6	stearoylcarnitine (C18)
		INF_Q8N6P7	laurylcarnitine (C12)
		INF_Q8NF90	isovalerylcarnitine (C5)
		INF_Q8NFT8	1-linoleoyl-GPC (18:2)
		INF_Q8WWJ7	1,7-dimethylurate
		INF_Q969D9	5-acetylamino-6-amino-3-methyluracil
		INF_Q99616	N1-methylinosine
		INF_Q99731	N2,N2-dimethylguanosine
		INF_Q99748	N6-carbamoylthreonyladenosine
		INF_Q9BZW8	orotidine
		INF_Q9H5V8	phenylacetylglutamine
		INF_Q9NRJ3	4-hydroxyhippurate
		INF_Q9NYY1	5,6-dihydrouridine
		INF_Q9NZQ7	3-(3-amino-3-carboxypropyl)uridine*
		INF_Q9P0M4	5-methyluridine (ribothymidine)
		INF_Q9UHF4	7-methylguanine
			1-stearoyl-GPE (18:0)
			N1-Methyl-2-pyridone-5-carboxamide
			gamma-glutamylisoleucine*
			oleoylcarnitine (C18:1)
			phenol sulfate
			1-palmitoleoyl-GPC (16:1)*
			pyroglutamine*
			2-hydroxy-3-methylvalerate
			1-arachidonoyl-GPC (20:4n6)*
			1-dihomo-linolenoyl-GPC (20:3n3 or 6)*
			1-dihomo-linoleoyl-GPC (20:2)*
			2-arachidonoyl-GPC (20:4)*
			2-oleoyl-GPC (18:1)*
			2-linoleoyl-GPC (18:2)*
			2-palmitoyl-GPC (16:0)*
			2-myristoyl-GPC (14:0)*
			1-docosahexaenoyl-GPC (22:6)*
			1-palmitoyl-GPE (16:0)
			1-oleoyl-GPE (18:1)
			1-linoleoyl-GPE (18:2)*
			1-arachidonoyl-GPE (20:4n6)*
			2-hydroxypalmitate
			glutarylcarnitine (C5-DC)
			tiglylcarnitine (C5:1-DC)
			catechol sulfate
			7-alpha-hydroxy-3-oxo-4-cholestenoate (7-Hoca)
			tetradecanedioate (C14-DC)
			hexadecanedioate (C16-DC)
			glycerophosphoethanolamine
			2-oleoyl-GPE (18:1)*
			2-palmitoyl-GPE (16:0)*
			1-arachidonoyl-GPI (20:4)*
			1-palmitoyl-GPI (16:0)
			glycolithocholate sulfate*
			taurolithocholate 3-sulfate
			deoxycarnitine
			1-ribosyl-imidazoleacetate*
			2-arachidonoyl-GPE (20:4)*
			hexanoylglutamine
			N6-acetyllysine
			dihomo-linolenate (20:3n3 or n6)
			mannitol/sorbitol
			tryptophan betaine
			4-vinylphenol sulfate
			4-ethylphenylsulfate
			thymol sulfate
			2-linoleoyl-GPE (18:2)*
			1-oleoyl-GPI (18:1)
			1-linoleoyl-GPI (18:2)*
			dimethylarginine (SDMA + ADMA)
			N-acetylserine
			1-stearoyl-2-oleoyl-GPE (18:0/18:1)
			4-allylphenol sulfate
			1-stearoyl-2-arachidonoyl-GPC (18:0/20:4)
			1-palmitoyl-2-linoleoyl-GPE (16:0/18:2)
			sphinganine-1-phosphate
			glycosyl-N-stearoyl-sphingosine (d18:1/18:0)
			succinylcarnitine (C4-DC)
			bilirubin (E,E)*
			bilirubin (E,Z or Z,E)*
			N-methylproline
			beta-cryptoxanthin
			5alpha-androstan-3beta,17beta-diol disulfate
			5alpha-pregnan-3beta,20alpha-diol disulfate
			glycocholenate sulfate*
			taurocholenate sulfate*
			androstenediol (3beta,17beta) disulfate (1)
			pregnenediol disulfate (C21H34O8S2)*
			androstenediol (3beta,17beta) disulfate (2)
			21-hydroxypregnenolone disulfate
			5alpha-pregnan-3beta,20beta-diol monosulfate (1)
			5alpha-pregnan-3beta,20alpha-diol monosulfate (2)
			5alpha-androstan-3alpha,17beta-diol monosulfate (1)
			androstenediol (3alpha, 17alpha) monosulfate (2)
			androstenediol (3alpha, 17alpha) monosulfate (3)
			androstenediol (3beta,17beta) monosulfate (1)
			androstenediol (3beta,17beta) monosulfate (2)
			1-docosahexaenoyl-GPE (22:6)*
			1-docosapentaenoyl-GPC (22:5n3)*
			pregnenediol sulfate (C21H34O5S)*
			gamma-CEHC
			N-acetyl-beta-alanine
			sphingomyelin (d18:1/18:1, d18:2/18:0)
			palmitoyl sphingomyelin (d18:1/16:0)
			3-hydroxyhippurate
			16a-hydroxy DHEA 3-sulfate
			pregnenolone sulfate
			ergothioneine
			1-pentadecanoyl-GPC (15:0)*
			13-HODE + 9-HODE
			tridecenedioate (C13:1-DC)*
			cis-4-decenoylcarnitine (C10:1)
			(16 or 17)-methylstearate (a19:0 or i19:0)
			isoursodeoxycholate
			sulfate*
			S-methylcysteine
			androsterone glucuronide
			argininate*
			2-oxoarginine*
			cis-4-decenoate (10:1n6)*
			1-adrenoyl-GPC (22:4)*
			1-(1-enyl-palmitoyl)-GPC (P-16:0)*
			1-methyl-5-imidazoleacetate
			glycoursodeoxycholate
			S-methylcysteine sulfoxide
			eicosanedioate (C20-DC)
			docosadioate (C22-DC)
			16-hydroxypalmitate
			oleoyl-linoleoyl-glycerol (18:1/18:2) [1]
			oleoyl-linoleoyl-glycerol (18:1/18:2) [2]
			1-(1-enyl-palmitoyl)-GPE (P-16:0)*
			1-(1-enyl-stearoyl)-GPE (P-18:0)*
			linoleoylcarnitine (C18:2)*
			beta-citrylglutamate
			trimethylamine N-oxide
			pregnanediol-3-glucuronide
			phenylalanyltryptophan
			N-palmitoylglycine
			2-stearoyl-GPE (18:0)*
			N-acetylcarnosine
			margaroylcarnitine (C17)*
			2-hydroxydecanoate
			4-methylcatechol sulfate
			3-methyl catechol sulfate (1)
			guaiacol sulfate
			2-piperidinone
			2-aminophenol sulfate
			sphingomyelin (d18:1/14:0, d16:1/16:0)*
			sphingomyelin (d18:2/16:0, d18:1/16:1)*
			6-oxopiperidine-2-carboxylate
			N-delta-acetylornithine
			acisoga
			2-aminoheptanoate
			1-eicosapentaenoyl-GPE (20:5)*
			methionine sulfone
			1-linolenoyl-GPC (18:3)*
			1-eicosapentaenoyl-GPC (20:5)*
			1-eicosenoyl-GPC (20:1)*
			1-dihomo-linolenoyl-GPE (20:3n3 or 6)*
			1-(1-enyl-oleoyl)-GPE (P-18:1)*
			O-sulfo-L-tyrosine
			etiocholanolone glucuronide
			N-acetyltaurine
			1-docosapentaenoyl-GPC (22:5n6)*
			9-hydroxystearate
			3-methylglutarylcarnitine (2)
			methyl glucopyranoside (alpha + beta)
			sphingomyelin (d18:2/14:0, d18:1/14:1)*
			sphingomyelin (d18:1/24:1, d18:2/24:0)*
			octadecenedioylcarnitine (C18:1-DC)*
			myristoleoylcarnitine (C14:1)*
			cyclo(pro-val)
			4-hydroxychlorothalonil
			3-hydroxypyridine sulfate
			arabonate/xylonate
			methyl-4-hydroxybenzoate sulfate
			p-cresol glucuronide*
			6-hydroxyindole sulfate
			sphingomyelin (d18:1/20:0, d16:1/22:0)*
			sphingomyelin (d18:1/20:1, d18:2/20:0)*
			sphingomyelin (d18:1/20:2, d18:2/20:1, d16:1/22:2)*
			behenoyl sphingomyelin (d18:1/22:0)*
			sphingomyelin (d18:1/22:1, d18:2/22:0, d16:1/24:1)*
			sphingomyelin (d18:1/22:2, d18:2/22:1, d16:1/24:2)*
			lignoceroyl sphingomyelin (d18:1/24:0)
			sphingomyelin (d17:1/16:0, d18:1/15:0, d16:1/17:0)*
			dopamine 3-O-sulfate
			3-hydroxyhexanoate
			3beta-hydroxy-5-cholestenoate
			C-glycosyltryptophan
			arabitol/xylitol
			adipoylcarnitine (C6-DC)
			glycodeoxycholate 3-sulfate
			1,2-dilinoleoyl-GPC (18:2/18:2)
			1-stearoyl-2-oleoyl-GPC (18:0/18:1)
			1-palmitoyl-2-arachidonoyl-GPC (16:0/20:4n6)
			1-palmitoyl-2-docosahexaenoyl-GPC (16:0/22:6)
			1-stearoyl-2-docosahexaenoyl-GPC (18:0/22:6)
			1-(1-enyl-stearoyl)-2-oleoyl-GPC (P-18:0/18:1)
			1-(1-enyl-stearoyl)-2-arachidonoyl-GPC (P-18:0/20:4)
			1-(1-enyl-stearoyl)-2-oleoyl-GPE (P-18:0/18:1)
			sphingomyelin (d18:1/17:0, d17:1/18:0, d19:1/16:0)
			1-palmitoyl-2-stearoyl-GPC (16:0/18:0)
			2-hydroxybutyrate/2-hydroxyisobutyrate
			oleate/vaccenate (18:1)
			palmitoyl dihydrosphingomyelin (d18:0/16:0)*
			tricosanoyl sphingomyelin (d18:1/23:0)*
			sphingomyelin (d18:2/23:0, d18:1/23:1, d17:1/24:1)*
			sphingomyelin (d18:2/24:1, d18:1/24:2)*
			1-stearoyl-2-linoleoyl-GPE (18:0/18:2)*
			1-stearoyl-2-arachidonoyl-GPE (18:0/20:4)
			1-stearoyl-2-linoleoyl-GPC (18:0/18:2)*
			1-palmitoyl-2-palmitoleoyl-GPC (16:0/16:1)*
			1-palmitoyl-2-eicosapentaenoyl-GPC (16:0/20:5)*
			1-palmitoyl-2-arachidonoyl-GPE (16:0/20:4)*
			1-palmitoyl-2-docosahexaenoyl-GPE (16:0/22:6)*
			1-stearoyl-2-docosahexaenoyl-GPE (18:0/22:6)*
			1-palmitoyl-2-arachidonoyl-GPI (16:0/20:4)*
			1-stearoyl-2-linoleoyl-GPI (18:0/18:2)
			gamma-tocopherol/beta-tocopherol
			1-(1-enyl-stearoyl)-2-arachidonoyl-GPE (P-18:0/20:4)*
			1-(1-enyl-palmitoyl)-2-docosahexaenoyl-GPE (P-16:0/22:6)*
			1-(1-enyl-palmitoyl)-2-arachidonoyl-GPE (P-16:0/20:4)*
			1-(1-enyl-stearoyl)-2-docosahexaenoyl-GPE (P-18:0/22:6)*
			1-(1-enyl-palmitoyl)-2-oleoyl-GPE (P-16:0/18:1)*
			1-(1-enyl-palmitoyl)-2-oleoyl-GPC (P-16:0/18:1)*
			1-(1-enyl-palmitoyl)-2-docosahexaenoyl-GPC (P-16:0/22:6)*
			1-(1-enyl-palmitoyl)-2-linoleoyl-GPC (P-16:0/18:2)*
			1-(1-enyl-palmitoyl)-2-arachidonoyl-GPC (P-16:0/20:4)*
			1-(1-enyl-stearoyl)-2-docosahexaenoyl-GPC (P-18:0/22:6)*
			1-stearyl-2-arachidonoyl-GPC (O-18:0/20:4)*
			1-palmityl-2-oleoyl-GPC (O-16:0/18:1)*
			1-palmityl-2-arachidonoyl-GPC (O-16:0/20:4)*
			sphingomyelin (d18:1/21:0, d17:1/22:0, d16:1/23:0)*
			behenoyl dihydrosphingomyelin (d18:0/22:0)*
			sphingomyelin (d18:0/18:0, d19:0/17:0)*
			N-palmitoyl-sphinganine (d18:0/16:0)
			lactosyl-N-palmitoyl-sphingosine (d18:1/16:0)
			1-pentadecanoyl-2-linoleoyl-GPC (15:0/18:2)*
			1-margaroyl-2-oleoyl-GPC (17:0/18:1)*
			1-margaroyl-2-linoleoyl-GPC (17:0/18:2)*
			myristoyl dihydrosphingomyelin (d18:0/14:0)*
			1-stearoyl-2-dihomo-linolenoyl-GPC (18:0/20:3n3 or 6)*
			palmitoyl-linoleoyl-glycerol (16:0/18:2) [1]*
			palmitoyl-linoleoyl-glycerol (16:0/18:2) [2]*
			1-palmitoyl-2-oleoyl-GPI (16:0/18:1)*
			1-(1-enyl-palmitoyl)-2-linoleoyl-GPE (P-16:0/18:2)*
			1-oleoyl-2-linoleoyl-GPE (18:1/18:2)*
			1-pentadecanoyl-2-arachidonoyl-GPC (15:0/20:4)*
			1-pentadecanoyl-2-docosahexaenoyl-GPC (15:0/22:6)*
			1-margaroyl-2-arachidonoyl-GPC (17:0/20:4)*
			1-margaroyl-2-docosahexaenoyl-GPC (17:0/22:6)*
			1-arachidoyl-2-arachidonoyl-GPC (20:0/20:4)*
			1-oleoyl-2-docosahexaenoyl-GPC (18:1/22:6)*
			1-linoleoyl-2-docosahexaenoyl-GPC (18:2/22:6)*
			1-palmityl-2-linoleoyl-GPC (O-16:0/18:2)*
			1-(1-enyl-stearoyl)-2-linoleoyl-GPC (P-18:0/18:2)*
			1-myristoyl-2-linoleoyl-GPC (14:0/18:2)*
			1-myristoyl-2-arachidonoyl-GPC (14:0/20:4)*
			1-myristoyl-2-docosahexaenoyl-GPC (14:0/22:6)*
			1-stearoyl-2-docosapentaenoyl-GPC (18:0/22:5n3)*
			1-stearoyl-2-docosapentaenoyl-GPC (18:0/22:5n6)*
			1-palmitoyl-2-adrenoyl-GPC (16:0/22:4)*
			1-stearoyl-2-adrenoyl-GPC (18:0/22:4)*
			1-(1-enyl-palmitoyl)-2-palmitoleoyl-GPC (P-16:0/16:1)*
			1-(1-enyl-palmitoyl)-2-palmitoyl-GPC (P-16:0/16:0)*
			phosphatidylcholine (16:0/22:5n3, 18:1/20:4)*
			1-stearoyl-2-oleoyl-GPI (18:0/18:1)*
			1-stearoyl-2-dihomo-linolenoyl-GPI (18:0/20:3n3 or 6)*
			1-stearoyl-2-dihomo-linolenoyl-GPE (18:0/20:3n3 or 6)*
			1-(1-enyl-stearoyl)-2-linoleoyl-GPE (P-18:0/18:2)*
			1-linoleoyl-GPG (18:2)*
			thioproline
			palmitoylcholine
			glycochenodeoxycholate glucuronide (1)
			(S)-3-hydroxybutyrylcarnitine
			glycosyl-N-palmitoyl-sphingosine (d18:1/16:0)
			oleoylcholine
			arachidonoylcholine
			1-linoleoyl-2-linolenoyl-GPC (18:2/18:3)*
			phosphatidylcholine (14:0/14:0, 16:0/12:0)
			phosphatidylcholine (15:0/18:1, 17:0/16:1, 16:0/17:1)*
			phosphatidylcholine (18:0/20:2, 20:0/18:2)*
			1-(1-enyl-oleoyl)-2-docosahexaenoyl-GPE (P-18:1/22:6)*
			1-(1-enyl-stearoyl)-2-dihomo-linolenoyl-GPE (P-18:0/20:3)*
			hexadecadienoate (16:2n6)
			palmitoleoylcarnitine (C16:1)*
			gamma-glutamyl-alpha-lysine
			palmitoyl-oleoyl-glycerol (16:0/18:1) [2]*
			oleoyl-oleoyl-glycerol (18:1/18:1) [1]*
			oleoyl-oleoyl-glycerol (18:1/18:1) [2]*
			linoleoyl-arachidonoyl-glycerol (18:2/20:4) [1]*
			palmitoleoyl-linoleoyl-glycerol (16:1/18:2) [1]*
			oleoyl-arachidonoyl-glycerol (18:1/20:4) [1]*
			oleoyl-arachidonoyl-glycerol (18:1/20:4) [2]*
			diacylglycerol (16:1/18:2 [2], 16:0/18:3 [1])*
			linoleoyl-linoleoyl-glycerol (18:2/18:2) [1]*
			stearoyl-arachidonoyl-glycerol (18:0/20:4) [1]*
			perfluorooctanesulfonate (PFOS)
			1-palmityl-2-stearoyl-GPC (O-16:0/18:0)*
			1-palmityl-2-palmitoyl-GPC (O-16:0/16:0)*
			1-stearyl-2-docosapentaenoyl-GPC (O-18:0/22:5n3)*
			1-(1-enyl-stearoyl)-2-docosapentaenoyl-GPE (P-18:0/22:5n3)*
			lactosyl-N-nervonoyl-sphingosine (d18:1/24:1)*
			glycosyl-N-behenoyl-sphingadienine (d18:2/22:0)*
			phosphatidylethanolamine (P-18:1/20:4, P-16:0/22:5n3)*
			ceramide (d18:1/14:0, d16:1/16:0)*
			glycosyl ceramide (d18:2/24:1, d18:1/24:2)*
			linoleoylcholine*
			sphingomyelin (d18:0/20:0, d16:0/22:0)*
			sphingomyelin (d18:1/19:0, d19:1/18:0)*
			sphingomyelin (d18:2/18:1)*
			sphingomyelin (d18:2/24:2)*
			sphingomyelin (d18:2/21:0, d16:2/23:0)*
			sphingomyelin (d18:2/23:1)*
			sphingomyelin (d18:1/25:0, d19:0/24:1, d20:1/23:0, d19:1/24:0)*
			sphingomyelin (d17:2/16:0, d18:2/15:0)*
			linolenoylcarnitine (C18:3)*
			lignoceroylcarnitine (C24)*
			cerotoylcarnitine (C26)*
			ximenoylcarnitine (C26:1)*
			arachidonoylcarnitine (C20:4)
			eicosenoylcarnitine (C20:1)*
			dihomo-linoleoylcarnitine (C20:2)*
			dihomo-linolenoylcarnitine (C20:3n3 or 6)*
			N,N,N-trimethyl-5-aminovalerate
			carotene diol (1)
			carotene diol (2)
			cortolone glucuronide (1)
			(N(1) + N(8))-acetylspermidine
			5-dodecenoylcarnitine (C12:1)
			hydroxy-CMPF*
			hexadecenedioate (C16:1-DC)*
			octadecenedioate (C18:1-DC)
			octadecadienedioate (C18:2-DC)*
			3-carboxy-4-methyl-5-pentyl-2-furanpropionate (3-CMPFP)**
			N-acetyl-2-aminooctanoate*
			hydroxyasparagine**
			perfluorooctanoate (PFOA)
			3-formylindole
			gamma-glutamylcitrulline*
			glycine conjugate of C10H14O2 (1)*
			glutamine conjugate of C6H10O2 (1)*
			tetradecadienoate (14:2)*
			N,N-dimethylalanine
			3-indoleglyoxylic acid
			ethyl beta-glucopyranoside
			ascorbic acid 3-sulfate*
			6-bromotryptophan
			1-carboxyethylphenylalanine
			dodecadienoate (12:2)*
			N-acetyl-isoputreanine
			glucuronide of piperine metabolite C17H21NO3 (4)*
			sulfate of piperine metabolite C16H19NO3 (2)*
			11beta-hydroxyandrosterone glucuronide
			deoxycholic acid glucuronide
			4-allylcatechol sulfate
			2-ketocaprylate
			2,3-dihydroxy-5-methylthio-4-pentenoate (DMTPA)*
			hydroxypalmitoyl sphingomyelin (d18:1/16:0(OH))**
			tetradecadienedioate (C14:2-DC)*
			pregnenetriol disulfate*
			eicosenedioate (C20:1-DC)*
			hydroxy-N6,N6,N6-trimethyllysine*
			undecenoylcarnitine (C11:1)
			palmitoyl-sphingosine-phosphoethanolamine (d18:1/16:0)
			3,5-dichloro-2,6-dihydroxybenzoic acid
			(S)-a-amino-omega-caprolactam
			metabolonic lactone sulfate
			branched chain 14:0 dicarboxylic acid**
			(2 or 3)-decenoate (10:1n7 or n8)
			branched-chain, straight-chain, or cyclopropyl 10:1 fatty acid (1)*
			3-bromo-5-chloro-2,6-dihydroxybenzoic acid*
			branched-chain, straight-chain, or cyclopropyl 12:1 fatty acid*
			decadienedioic acid (C10:2-DC)**
			cis-3,4-methyleneheptanoate
			cis-3,4-methyleneheptanoylcarnitine
			4-chlorobenzoic acid
			2,4-di-tert-butylphenol
			3-hydroxyoctanoylcarnitine (1)
			cis-3,4-methyleneheptanoylglycine
			bilirubin degradation product, C16H18N2O5 (1)**
			bilirubin degradation product, C16H18N2O5 (2)**
			bilirubin degradation product, C17H18N2O4 (1)**
			bilirubin degradation product, C17H18N2O4 (2)**
			bilirubin degradation product, C17H18N2O4 (3)**
			bilirubin degradation product, C17H20N2O5 (1)**
			bilirubin degradation product, C17H20N2O5 (2)**
			tetrahydrocortisol glucuronide
			N,N-dimethyl-pro-pro
			oxindolylalanine
			tetrahydrocortisone glucuronide (5)
			X - 11381
			X - 11787
			X - 11795
			X - 21258
			X - 19438
			X - 15486
			X - 21286
			X - 21310
			X - 21319
			X - 21339
			X - 11308
			X - 21353
			X - 21364
			X - 13866
			X - 21383
			X - 11444
			X - 21467
			X - 21470
			X - 21471
			X - 07765
			X - 11299
			X - 11372
			X - 11378
			X - 11470
			X - 11478
			X - 11849
			X - 11880
			X - 12216
			X - 12411
			X - 12462
			X - 12798
			X - 14056
			X - 12844
			X - 13728
			X - 14939
			X - 21607
			X - 16935
			X - 18901
			X - 18913
			X - 18922
			X - 19141
			X - 17653
			X - 21736
			X - 17676
			X - 21796
			X - 15503
			X - 21829
			X - 22162
			X - 12680
			X - 12101
			X - 11483
			X - 18921
			X - 12100
			X - 13431
			X - 16397
			X - 16580
			X - 17335
			X - 12026
			X - 12906
			X - 13729
			X - 17010
			X - 17357
			X - 23636
			X - 23639
			X - 23644
			X - 23680
			X - 11315
			X - 23739
			X - 23782
			X - 24295
			X - 24306
			X - 24307
			X - 24328
			X - 24544
			X - 24556
			X - 24588
